# Supplementary material for: SK4 K+ channels are therapeutic targets for the treatment of cardiac arrhythmias
Source: PubMed Central journal article supplement (PMC5376763; doi:10.15252/emmm.201606937), 2017-02-20
Supplement: EMMM-9-415-s001.pdf [file EMMM-9-415-s001.pdf]

## Appendix

### Table of contents:

#### **1. Mathematical model (p.1)**

##### **1.1. Appendix: Mathematical Modelling (p.1)**

##### **1.2. References (p.16)**

#### **2. Supplementary Figure Legends (p.18)**

#### **3. Appendix Supplementary Figures (p.21)**

##### *1. Mathematical model*

Using mathematical modelling, the SK4 K<sup>+</sup> conductance contribution to SAN firing rate was examined. For that purpose the mathematical model of mouse SAN designed by Kharche et al. (Kharche et al., 2011) was implemented and the SK4 current ( $I_{SK4}$ ) was added to the modelling. The contribution of  $I_{SK4}$  was analyzed by simulating the effect of the SK4 channel blocker TRAM-34 and compared to the experimental findings. For the mathematical modelling of  $I_{SK4}$  we used from the Ca<sup>2+</sup>-dependent sensitivity curve of SK4 channel activation,  $n_x = 2.7$  (the slope of the Hill curve) and  $k_x = 0.27 \mu\text{M}$  (Ca<sup>2+</sup> dissociation constant for SK4 activation) as measured by Logsdon et al. (Logsdon et al., 1997). In addition, the opening of SK channels has been shown to be the result of a sequence of events starting with Ca<sup>2+</sup> binding to calmodulin followed by conformational changes of calmodulin and SK channels that will result in structural rearrangements of the pore-occluding gate domain (Berkefeld et al., 2010). The time constant of the activation process ( $\tau_a$ ) was assumed to 5 ms under Ca<sup>2+</sup> saturation. Channel deactivation, initiated upon dissociation of Ca<sup>2+</sup>, is reflected by the deactivation time constant ( $\tau_d$ ), which is assumed to range between 15 and 60 ms (Hirschberg et al., 1998; Pedarzani et al., 2001; Xia et al., 1998). We used  $\tau_a = 5$  ms and  $\tau_d = 50$  ms for the activation and deactivation time constants, respectively. Finally, we assumed that the maximal amplitude reached by  $I_{SK4}$  was 1.8 pA/pF, which corresponds to the current measured in the present paper at +20 mV.

##### **1.1. Appendix: Mathematical Modelling**

### a. Introduction

We extended the computational model of mouse SANCs function from Kharche et al. (Kharche et al., 2011) to include the SK4 ion channel denoted  $I_{SK4}$ . The intracellular concentration of  $K^+$  and  $Na^+$  were assumed to be constant and the SK4 channel formulation was added.

### b. Mice model

It is assumed that the net current passing through the membrane is determined by the following equation:

$$(1) I = I_{Na,1.1} + I_{Na,1.5} + I_{CaL,1.2} + I_{CaL,1.3} + I_{CaT} + I_{Kr} + I_{Ks} + I_f + I_{to} + I_{sus} + I_{K1} + I_{NaK} \\ + I_{NaCa} + I_{b,Na} + I_{b,K} + I_{b,Ca} + I_{SK4},$$

with,  $I_{Na,1.1}$  the  $Na^+$  channel isoform Nav1.1 current,  $I_{Na,1.5}$  the  $Na^+$  channel isoform Nav1.5 current,  $I_{CaL,1.2}$  the L-type  $Ca^{2+}$  channel isoform Cav1.2 current,  $I_{CaL,1.3}$  the L-type  $Ca^{2+}$  channel isoform Cav1.3 current,  $I_{CaT}$  the T-type  $Ca^{2+}$  current,  $I_{Kr}$  the rapid delayed rectifying  $K^+$  current,  $I_{Ks}$  the slow delayed rectifying  $K^+$  current,  $I_f$  the hyperpolarization-activated current,  $I_{to}$  the transient component of 4-AP-sensitive currents,  $I_{sus}$  the sustained component of 4-AP-sensitive currents,  $I_{K1}$  the rapid delayed rectifying  $K^+$  current,  $I_{NaK}$  the  $Na^+$ - $K^+$  pump current,  $I_{NaCa}$  the  $Na^+$ / $Ca^{2+}$  exchanger current,  $I_{b,Na}$  the background  $Na^+$  current,  $I_{b,K}$  background  $K^+$  current,  $I_{b,Ca}$  the background  $Ca^{2+}$  current and  $I_{SK4}$  the calcium-activated potassium channel SK4.

### c. Equations

#### Formulation of $I_{SK4}$

SK channels typically show little or no voltage dependence (Latorre et al., 1989). However, an increase in  $Ca^{2+}$  concentration ( $[Ca_{sub}^{2+}]$ ) leads to an increase in the open probability of the channel ( $f_{SK}$ ). It is assumed that the relationship between the  $Ca^{2+}$  concentration and the steady-state open probability follows a Hill equation (McManus, 1991; Silva et al., 2007). The Hill equation can empirically be described by two parameters: the slope of the curve ( $n_x$ ) and the midpoint of the curve ( $k_x$ ). Steady-state  $Ca^{2+}$  dependent value of  $f_{SK}$  gate:

$$f_{SK,\infty} = \frac{[Ca_{sub}^{2+}]^{nx}}{[Ca_{sub}^{2+}]^{nx} + kx^{nx}}$$

Time constant – assumed to be only dependent on whether the channels are operating during diastolic depolarization or repolarization.

During diastolic depolarization:

$$\tau_f = 5 \text{ ms}$$

During repolarization:

$$\tau_f = 50 \text{ ms}$$

Current formulation:

$$I_{SK4} = C \cdot g_{SK4} \cdot f_{SK} \cdot (V_m - E_K)$$

$$\frac{df_{SK}}{dt} = \frac{(f_{SK,\infty} - f_{SK})}{\tau_f}$$

### Model constants

| Model Parameter                          | Value      | Definition                                    |
|------------------------------------------|------------|-----------------------------------------------|
| <b>C, pF</b>                             | 25         | Cell electric capacitance                     |
| <b>F, C/M</b>                            | 96485      | The Faraday constant                          |
| <b>T, K</b>                              | 310.5      | The absolute temperature for 37°C             |
| <b>R, J/(M K)</b>                        | 8.314472   | Universal gas constant                        |
| <b>V<sub>cell</sub>, pL</b>              | 3          | Cell volume                                   |
| <b>V<sub>sub</sub>, pL</b>               | 0.03328117 | Subspace volume                               |
| <b>V<sub>JSR</sub>, pL</b>               | 0.0036     | Volume of the JSR                             |
| <b>V<sub>NSR</sub>, pL</b>               | 0.0348     | Volume of NSR (Ca <sup>2+</sup> uptake store) |
| <b>V<sub>i</sub>, pL</b>                 | 1.34671883 | Myoplasmic volume                             |
| <b>[Mg<sup>2+</sup>]<sub>i</sub>, mM</b> | 2.5        | Intracellular Mg <sup>2+</sup>                |
| <b>[Na<sup>+</sup>]<sub>o</sub>, mM</b>  | 140        | Extracellular Na <sup>+</sup>                 |

|                                |                |                                                                                         |
|--------------------------------|----------------|-----------------------------------------------------------------------------------------|
| $[Ca^{2+}]_o, \text{mM}$       | 1.8            | Extracellular $Ca^{2+}$                                                                 |
| $[K^+]_o, \text{mM}$           | 5.4            | Extracellular $K^+$                                                                     |
| $[Na^+]_i, \text{mM}$          | 8.1179761505   | Intracellular $Na^+$ concentration                                                      |
| $[K^+]_i, \text{mM}$           | 139.8854603066 | Intracellular $K^+$ concentration                                                       |
| $g_{st}, \text{nS/pF}$         | 0.0024         | Normalized conductance for $I_{st}$ channels                                            |
| $E_{st}, \text{mV}$            | 17             | Apparent reversal potential of $I_{st}$                                                 |
| $g_{bNa}, \text{nS/pF}$        | 0.00486        | Normalized conductance for $I_{bNa}$ channels                                           |
| $g_{K1}, \text{nS/pF}$         | 0.0324         | Normalized conductance for $I_{K1}$ channels                                            |
| $g_{Ks}, \text{nS/pF}$         | 0.01196        | Normalized conductance for $I_{Ks}$ channels                                            |
| $E_{CaL}, \text{mV}$           | 47             | Reversal potential of $I_{CaL}$                                                         |
| $K_{mfCa}, \text{mM}$          | 0.00035        | Dissociation constant of $Ca^{2+}$ -dependent inactivation of $I_{CaL}$                 |
| $\alpha_{fCa}, \text{ms}^{-1}$ | 0.021          | $Ca^{2+}$ dissociation rate constant for $I_{CaL}$                                      |
| $E_{CaT}, \text{mV}$           | 45             | Reversal potential of $I_{CaT}$                                                         |
| $g_{sus}, \text{nS/pF}$        | 0.0156         | Normalized conductance for $I_{sus}$ channels                                           |
| $I_{NaKmax}, \text{pA/pF}$     | 5.698          | Maximal Na/K pump current conductance                                                   |
| $K_{mNa}, \text{mM}$           | 14             | Half-maximal $[Na^+]_i$ for $I_{NaK}$                                                   |
| $K_{mK}, \text{mM}$            | 1.4            | Half-maximal $[K^+]_o$ for $I_{NaK}$                                                    |
| $K_{1ni}, \text{mM}$           | 395.3          | Dissociation constant for $[Na^+]_i$ binding to the first site on $I_{NCX}$ transporter |
| $K_{1no}, \text{mM}$           | 1628           | Dissociation constant for $[Na^+]_o$ binding to first site on $I_{NCX}$ transporter     |
| $K_{2ni}, \text{mM}$           | 2.289          | Dissociation constant for $[Na^+]_i$ binding to second site on $I_{NCX}$ transporter    |
| $K_{2no}, \text{mM}$           | 561.4          | Dissociation constant for $[Na^+]_o$ binding to second site on $I_{NCX}$ transporter    |
| $K_{3ni}, \text{mM}$           | 26.44          | Dissociation constant for $[Na^+]_i$ binding to third site on $I_{NCX}$ transporter     |
| $K_{3no}, \text{mM}$           | 4.663          | Dissociation constant for $[Na^+]_o$ binding to third site on $I_{NCX}$ transporter     |

|                                                                  |         |                                                                                                         |
|------------------------------------------------------------------|---------|---------------------------------------------------------------------------------------------------------|
| <b><math>K_{ci}</math>, mM</b>                                   | 0.0207  | Dissociation constant for $[Ca^{2+}]_i$ binding on $I_{NCX}$ transporter                                |
| <b><math>K_{co}</math>, mM</b>                                   | 3.663   | Dissociation constant for $[Ca^{2+}]_o$ binding to $I_{NCX}$ transporter                                |
| <b><math>K_{cni}</math>, mM</b>                                  | 26.44   | Dissociation constant for $[Na^+]_i$ and $[Ca^{2+}]_i$ simultaneous binding to $I_{NCX}$ transporter    |
| <b><math>Q_{ci}</math></b>                                       | 0.1369  | Fractional charge movement during the $[Ca^{2+}]_{sub}$ occlusion reaction of the $I_{NCX}$ transporter |
| <b><math>Q_{co}</math></b>                                       | 0       | Fractional charge movement during the $[Ca^{2+}]_o$ occlusion reaction of the $I_{NCX}$ transporter     |
| <b><math>Q_n</math></b>                                          | 0.4315  | Fractional charge movement during $Na^+$ occlusion reactions of the $I_{NCX}$ transporter               |
| <b><math>\tau_{difCa}</math>, ms</b>                             | 0.04    | Time constant of $Ca^{2+}$ diffusion from the submembrane to myoplasm                                   |
| <b><math>TC_{tot}</math>, mM</b>                                 | 0.031   | Total concentration of the troponin- $Ca^{2+}$ site                                                     |
| <b><math>TMC_{tot}</math>, mM</b>                                | 0.062   | Total concentration of the troponin- $Mg^{2+}$ site                                                     |
| <b><math>k_{fTC}</math>, <math>mM^{-1} \cdot ms^{-1}</math></b>  | 88.8    | $Ca^{2+}$ association constant of troponin                                                              |
| <b><math>k_{fTMC}</math>, <math>mM^{-1} \cdot ms^{-1}</math></b> | 237.7   | $Ca^{2+}$ association constant of the troponin-Mg site                                                  |
| <b><math>k_{bTC}</math>, <math>ms^{-1}</math></b>                | 0.446   | $Ca^{2+}$ dissociation constant for the troponin-Ca site                                                |
| <b><math>k_{bTMC}</math>, <math>ms^{-1}</math></b>               | 0.00751 | $Ca^{2+}$ dissociation constant for the troponin-Mg site                                                |
| <b><math>k_{fTMM}</math>, <math>mM^{-1} \cdot ms^{-1}</math></b> | 2.277   | $Mg^{2+}$ association constant for the troponin-Mg site                                                 |
| <b><math>k_{bTMM}</math>, <math>ms^{-1}</math></b>               | 0.751   | $Mg^{2+}$ dissociation constant for the troponin-Mg site                                                |

|                                                           |          |                                                                                     |
|-----------------------------------------------------------|----------|-------------------------------------------------------------------------------------|
| <b>CM<sub>tot</sub>, mM</b>                               | 0.045    | Total calmodium concentration                                                       |
| <b>k<sub>fCM</sub>, mM<sup>-1</sup> · ms<sup>-1</sup></b> | 237.7    | Ca <sup>2+</sup> association constant for calsequestrin                             |
| <b>k<sub>bCM</sub>, ms<sup>-1</sup></b>                   | 0.542    | Ca <sup>2+</sup> dissociation constant for calmodulin                               |
| <b>CQ<sub>tot</sub>, mM</b>                               | 10       | Total calsequestrin concentration                                                   |
| <b>k<sub>fCQ</sub>, mM<sup>-1</sup> · ms<sup>-1</sup></b> | 0.534    | Ca <sup>2+</sup> association constant for calsequestrin                             |
| <b>k<sub>bCQ</sub>, 1/ms</b>                              | 0.445    | Dissociation constant for calsequestrin                                             |
| <b>k<sub>oCa</sub>, 1/(mM<sup>2</sup> · ms)</b>           | 10       | Baseline non-SR-dependent transition rate constant for the RyR                      |
| <b>k<sub>om</sub>, ms<sup>-1</sup></b>                    | 0.06     | Rate transition constant for RyR                                                    |
| <b>k<sub>iCa</sub>, mM<sup>-1</sup> · ms<sup>-1</sup></b> | 0.5      | RyR Ca <sup>2+</sup> dependent inactivation rate                                    |
| <b>k<sub>im</sub>, ms<sup>-1</sup></b>                    | 0.005    | Rate transition constant for RyR                                                    |
| <b>EC<sub>50SR</sub>, mM</b>                              | 0.45     | EC50 for Ca <sup>2+</sup> SR-dependent activation of SR Ca <sup>2+</sup> release    |
| <b>MaxSR</b>                                              | 15       | Ca <sup>2+</sup> modeling parameter                                                 |
| <b>MinSR</b>                                              | 1        | Ca <sup>2+</sup> modeling parameter                                                 |
| <b>HSR</b>                                                | 2.5      | Parameter for Ca <sup>2+</sup> -dependent activation of SR Ca <sup>2+</sup> release |
| <b>n<sub>up</sub></b>                                     | 2        | SR Ca <sup>2+</sup> uptake and Hill coefficient                                     |
| <b>g<sub>Na15</sub>, nS/pF</b>                            | 0.000237 | Normalized conductance for I <sub>Na15</sub> channels                               |
| <b>g<sub>Na11</sub>, nS/pF</b>                            | 0.000237 | Normalized conductance for I <sub>Na11</sub> channels                               |
| <b>g<sub>CaL12</sub>, nS/pF</b>                           | 0.24     | Normalized conductance for I <sub>Na12</sub> channels                               |
| <b>g<sub>CaL13</sub>, nS/pF</b>                           | 0.72     | Normalized conductance for I <sub>Na13</sub> channels                               |
| <b>g<sub>CaT</sub>, nS/pF</b>                             | 0.5586   | Normalized conductance for I <sub>CaT</sub> channels                                |
| <b>g<sub>If</sub>, nS/pF</b>                              | 0.228    | Normalized conductance for I <sub>If</sub> channels                                 |
| <b>g<sub>Kr</sub>, nS/pF</b>                              | 0.09456  | Normalized conductance for I <sub>Kr</sub> channels                                 |

|                   |                              |                                                                            |
|-------------------|------------------------------|----------------------------------------------------------------------------|
| $g_{to}, nS/pF$   | 0.1968                       | Normalized conductance for $I_{to}$ channels                               |
| $g_{SK4}, nS/pF$  | 0.0195                       | Normalized conductance for $I_{SK4}$ channels                              |
| $K_{NaCa}, pA/pF$ | 220                          | Scaling factor for $I_{NaCa}$                                              |
| $P_{up}, mM/ms$   | 0.04                         | Rate constant for $Ca^{2+}$ uptake by the $Ca^{2+}$ pump in the network SR |
| $k_s, ms^{-1}$    | 130e4                        | Release rate parameter                                                     |
| $K_{mf}, mM$      | 0.00008                      | Forward-mode $Ca^{2+}$ affinity of the SERCA pump                          |
| $K_{mr}, mM$      | 4.5                          | Reverse-mode $Ca^{2+}$ affinity of the SERCA pump                          |
| $g_{bCa}, nS/pF$  | 0.0006                       | Normalized conductance for $I_{bCa}$ channels                              |
| $g_{bK}, nS/pF$   | 0.001                        | Normalized conductance for $I_{bK}$ channels                               |
| $\tau_{tr}, ms$   | 40                           | Time constant for $Ca^{2+}$ transport from the network to junctional SR    |
| $E_T, mV$         | $1000 \cdot (R \cdot T / F)$ |                                                                            |
| $K_{up}, mM$      | 0.0006                       | Half-maximal $[Ca^{2+}]_i$ for $Ca^{2+}$ uptake in the NSR                 |
| $E_{Na15}, mV$    | 41.5761                      | Reversal potential of $I_{Na1.5}$                                          |

### Initial conditions

| Model Parameter | Value          | Definition                               |
|-----------------|----------------|------------------------------------------|
| $V_m, mV$       | -64.5216286940 | Membrane potential                       |
| $q_a$           | 0.6246780312   | Activation gating variable of $I_{st}$   |
| $q_i$           | 0.4537033169   | Inactivation gating variable of $I_{st}$ |
| $d_T$           | 0.0016256324   | Inactivation gate of $I_{CaT}$           |
| $f_T$           | 0.4264459666   | Activation gate of $I_{CaT}$             |
| $p_a$           | 0.4043600437   | Activation gating variable of $I_{Kr}$   |
| $p_i$           | 0.9250035423   | Inactivation gating variable of $I_{Kr}$ |

|                       |              |                                                                                               |
|-----------------------|--------------|-----------------------------------------------------------------------------------------------|
| $x_s$                 | 0.0127086259 | Activation gating variable of $I_{Ks}$                                                        |
| $f_{L,1.2}$           | 0.9968141226 | Inactivation gate for $I_{CaL,1.2}$                                                           |
| $d_{L,1.2}$           | 0.0000045583 | Activation gate for $I_{CaL,1.2}$                                                             |
| $f_{L,1.3}$           | 0.9809298233 | Inactivation gate for $I_{CaL,1.3}$                                                           |
| $d_{L,1.3}$           | 0.0002036671 | Activation gate for $I_{CaL,1.3}$                                                             |
| $f_{Ca}$              | 0.7649576191 | Ca <sup>2+</sup> -dependent inactivation gating variable for $I_{CaL,1.2}$ and $I_{CaL,1.3}$  |
| $r$                   | 0.0046263658 | Activation gating variable of $I_{to}$ and $I_{sus}$                                          |
| $q$                   | 0.6107148187 | Inactivation gating variable of $I_{to}$                                                      |
| $m_{1.5}$             | 0.4014088304 | Activation gating variable of Nav1.5                                                          |
| $h_{1.5}$             | 0.2724817537 | Fast inactivation gating variable of Nav1.5                                                   |
| $j_{1.5}$             | 0.0249208708 | Slow inactivation gating variable of Nav1.5                                                   |
| $m_{1.1}$             | 0.1079085266 | Activation gating variable of Nav1.1                                                          |
| $h_{1.1}$             | 0.4500098710 | Fast inactivation gating variable of Nav1.1                                                   |
| $j_{1.1}$             | 0.0268486392 | Slow inactivation gating variable of Nav1.1                                                   |
| $y$                   | 0.0279984462 | Activation gating variable of $I_f$                                                           |
| $[Ca^{2+}]_i, mM$     | 0.0000319121 | Intracellular Ca <sup>2+</sup> concentration or Ca <sup>2+</sup> concentration in the cytosol |
| $[Ca^{2+}]_{jSR}, mM$ | 0.1187281829 | Ca <sup>2+</sup> concentration in the JSR                                                     |
| $[Ca^{2+}]_{nSR}, mM$ | 1.5768287365 | Ca <sup>2+</sup> concentration in the NSR                                                     |
| $[Ca^{2+}]_{sub}, mM$ | 0.0000560497 | Ca <sup>2+</sup> concentration in the subspace                                                |
| $f_{TC}$              | 0.0063427103 | Fractional occupancy of the troponin Ca <sup>2+</sup> site by $[Ca^{2+}]_i$                   |
| $f_{TMC}$             | 0.1296677919 | Fractional occupancy of the troponin Mg <sup>2+</sup> site by $[Ca^{2+}]_i$                   |
| $f_{TMM}$             | 0.7688656371 | Fractional occupancy of the troponin Mg <sup>2+</sup> site by Mg <sup>2+</sup>                |
| $f_{CMs}$             | 0.0242054739 | Fractional occupancy of calmodulin by $[Ca^{2+}]_{sub}$                                       |



|           |              |                                                            |
|-----------|--------------|------------------------------------------------------------|
| $f_{CMi}$ | 0.0138533048 | Fractional occupancy of calmodulin by $[Ca^{2+}]_i$        |
| $f_{CQ}$  | 0.1203184861 | Fractional occupancy of calsequestrin by $[Ca^{2+}]_{rel}$ |
| $R$       | 0.7720290515 | Fraction of reactivated (closed) RyR channels              |
| $OO$      | 0.0000000760 | Open fraction of RyR channels                              |
| $S$       | 0.0000000213 | Inactive fraction of RyR channels                          |
| $RI$      | 0.2162168926 | Fraction of RyR inactivated channels                       |

### Gating variables

$$dg/dt = (g_{\infty} - g)/\tau_g$$

For any gating variable  $g$  with steady state  $g_{\infty}$

### 4-aminopyridine-sensitive currents, $I_{to}$ and $I_{sus}$

$$I_{to} = C \cdot g_{to} \cdot (V_m - E_K) \cdot q \cdot r$$

$$I_{sus} = C \cdot g_{sus} \cdot (V_m - E_K) \cdot r$$

$$q_{\infty} = 1/(1 + \exp((V_m + 49.0)/13.0))$$

$$r_{\infty} = 1/(1 + \exp(-(V_m - 19.3)/15.0))$$

$$\tau_q = (6.06 + 39.102/(0.57 \cdot \exp(-0.08 \cdot (V_m + 44.0)) + 0.065 \cdot \exp(0.1 \cdot (V_m + 45.93))))/0.67$$

$$\tau_r = (2.75 + 14.40516/(1.037 \cdot \exp(0.09 \cdot (V_m + 30.61)) + 0.369 \cdot \exp(-0.12 \cdot (V_m + 23.84))))/0.303$$

### Ca<sup>2+</sup> background current, $I_{bCa}$

$$I_{bCa} = C \cdot g_{bCa} \cdot (V_m - E_{Ca})$$

**K<sup>+</sup> background current,  $I_{bK}$** 

$$I_{bK} = C \cdot g_{bK} \cdot (V_m - E_K)$$

**Na<sup>+</sup> background current,  $I_{bNa}$** 

$$I_{bNa} = C \cdot g_{bNa} \cdot (V_m - E_{Na})$$

**L-type channel current,  $I_{CaL}$** 

$$I_{CaL12} = C \cdot g_{CaL12} \cdot (V_m - E_{CaL}) \cdot d_{L12} \cdot f_{L12} \cdot f_{Ca}$$

$$I_{CaL13} = C \cdot g_{CaL13} \cdot (V_m - E_{CaL}) \cdot d_{L13} \cdot f_{L13} \cdot f_{Ca}$$

$$I_{CaL} = I_{CaL12} + I_{CaL13}$$

$$d_{\infty 12} = 1/(1 + \exp(-(V_m + 3.0)/5.0))$$

$$f_{\infty 12} = 1/(1 + \exp((V_m + 36.0)/4.6))$$

$$d_{\infty 13} = 1/(1 + \exp(-(V_m + 13.5)/6))$$

$$f_{\infty 13} = 1/(1 + \exp((V_m + 35.0)/7.3))$$

$$f_{Ca\infty} = K_{mfCa}/(K_{mfCa} + Ca_{sub})$$

$$\alpha_{dL} = -28.39 \cdot (V_m + 35)/(\exp(-(V_m + 35)/2.5) - 1) - 84.9 \cdot V_m/(\exp(-0.208 \cdot V_m) - 1)$$

$$\beta_{dL} = 11.43 \cdot (V_m - 5.0)/(\exp(0.4 \cdot (V_m - 5.0)) - 1)$$

$$\tau_{dL} = 2000/(\alpha_{dL} + \beta_{dL})$$

$$\tau_{fL} = (7.4 + 45.77 \cdot \exp(-0.5 \cdot (V_m + 28.1)) \cdot (V_m + 28.1)/(11 \cdot 11))$$

$$\tau_{fCa} = f_{Ca\infty}/\alpha_{fCa}$$

**T-type Ca<sup>2+</sup> current,  $I_{CaT}$** 

$$I_{CaT} = C \cdot g_{CaT} \cdot (V_m - E_{CaT}) \cdot d_T \cdot f_T$$

$$\begin{aligned}
d_{T\infty} &= 1/(1 + \exp(-(V_m + 26)/6)) \\
f_{T\infty} &= 1/(1 + \exp((V_m + 61.7)/5.6)) \\
\tau_{dT} &= 1/(1.068 \cdot \exp((V_m + 26.3)/30) + 1.068 \cdot \exp(-(V_m + 26.3)/30)) \\
\tau_{fT} &= 1/(0.0153 \cdot \exp(-(V_m + 61.7)/83.3) + 0.015 \cdot \exp((V_m + 61.7)/15.38))
\end{aligned}$$

### Hyperpolarization-activated, funny current, $I_f$

$$\begin{aligned}
I_{fNa} &= C \cdot 0.3833 \cdot g_{If} \cdot (V_m - E_{Na}) \cdot y \\
I_{fK} &= C \cdot 0.6167 \cdot g_{If} \cdot (V_m - E_K) \cdot y \\
y_{\infty} &= 1/(1 + \exp((V_m + 106.8)/16.3)) \\
\tau_y &= 1.5049/(\exp(-(V_m + 590.3) \cdot 0.01094) + \exp((V_m - 85.1)/17.2))
\end{aligned}$$

### K1 current, $I_{K1}$

$$\begin{aligned}
I_{K1} &= C \cdot g_{K1} \cdot 1/(1 + \exp(0.070727 \cdot (V_m - E_K))) \cdot ([K^+]_o/([K^+]_o + 0.228880)) \cdot (V_m \\
&\quad - E_K)
\end{aligned}$$

### Kr current, $I_{Kr}$

$$\begin{aligned}
I_{Kr} &= C \cdot g_{Kr} \cdot (V_m - E_K) \cdot p_a \cdot p_i \\
p_{a\infty} &= 1/(1 + \exp(-(V_m + 21.173694)/9.757086)) \\
p_{i\infty} &= 1/(1 + \exp((V_m + 20.758474 - 4.0)/(19.0))) \\
\tau_{pa} &= 0.699821/(0.003596 \cdot \exp((V_m)/15.339290) + 0.000177 \cdot \exp(-(V_m)/25.868423)) \\
\tau_{pi} &= 0.2 + 0.9 \cdot 1.0/(0.1 \cdot \exp(V_m/54.645) + 0.656 \cdot \exp(V_m/106.157))
\end{aligned}$$

### Ks current, $I_{Ks}$

$$I_{Ks} = C \cdot g_{Ks} \cdot (V_m - E_{Ks}) \cdot xS^2$$

$$\begin{aligned}
x_{s\infty} &= 1/(1 + \exp(-(V_m - 20.876040)/11.852723)) \\
\tau_{xs} &= 1000/(13.097938/(1 + \exp(-(V_m - 48.910584)/10.630272)) \\
&\quad + \exp(-V_m/35.316539))
\end{aligned}$$

### Sodium current, $I_{Na}$

$$\begin{aligned}
FNa &= (9.52e - 02 \cdot \exp(-6.3e - 2 \cdot (V_m + 34.4))/(1 + 1.66 \cdot \exp(-0.225 \cdot (V_m + 63.7)))) \\
&\quad + 8.69e - 2
\end{aligned}$$

$$hs_{11} = (1 - FNa) \cdot h_{11} + FNa \cdot j_{11}$$

$$hs_{15} = (1 - FNa) \cdot h_{15} + FNa \cdot j_{15}$$

$$\begin{aligned}
I_{Na11} &= C \cdot g_{Na11} \cdot m_{11}^3 \cdot hs_{11} \cdot V_m \cdot [Na]_0 \cdot F/(E_T \cdot 1000) \cdot (\exp((V_m - E_{Na})/E_T) \\
&\quad - 1)/(\exp(V_m/E_T) - 1)
\end{aligned}$$

$$\begin{aligned}
I_{Na15} &= C \cdot g_{Na15} \cdot m_{15}^3 \cdot hs_{15} \cdot V_m \cdot [Na]_0 \cdot F/(E_T \cdot 1000) \cdot (\exp((V_m - E_{Na15})/E_T) \\
&\quad - 1)/(\exp(V_m/E_T) - 1)
\end{aligned}$$

$$I_{Na} = I_{Na11} + I_{Na15}$$

$$m_{11,\infty} = 1/(1 + \exp(-(V_m + 36.097331 - 5.0)/5.0))^{(1/3)}$$

$$h_{11,\infty} = 1/(1 + \exp((V_m + 56.0)/3.0))$$

$$j_{11,\infty} = h_{11,\infty}$$

$$m_{15,\infty} = 1/(1 + \exp(-(V_m + 45.213705)/7.219547))^{(1/3)}$$

$$h_{15,\infty} = 1/(1 + \exp(-(V_m + 62.578120)/(-6.084036)))$$

$$j_{15,\infty} = h_{15,\infty}$$

$$\begin{aligned}
\tau_{m11} &= 1000 \cdot ((0.6247e - 03/(0.832 \cdot \exp(-0.335 \cdot (V_m + 56.7)) + 0.627 \cdot \exp(0.082 \cdot (V_m \\
&\quad + 65.01)))) + 0.0000492)
\end{aligned}$$

$$\tau_{h11} = 1000.0 \cdot (((3.717e - 06 \cdot \exp(-0.2815 \cdot (V_m + 17.11)))/(1 + 0.003732 \cdot \exp(-0.3426 \cdot (V_m + 37.76)))) + 0.0005977)$$

$$\tau_{j11} = 1000 \cdot (((0.00000003186 \cdot \exp(-0.6219 \cdot (V_m + 18.8)))/(1 + 0.00007189 \cdot \exp(-0.6683 \cdot (V_m + 34.07)))) + 0.003556)$$

$$\tau_{m15} = \tau_{m11}$$

$$\tau_{h15} = \tau_{h11}$$

$$\tau_{j15} = \tau_{j11}$$

### Na<sup>+</sup> - K<sup>+</sup> pump current, $I_{NaK}$

$$I_{NaK} = C \cdot I_{NaKmax} \cdot ((([K^+]_o)^{1.2} / ((K_{mK})^{1.2} + ([K^+]_o)^{1.2})) \cdot ((([Na^+]_i)^{1.3} / ((K_{mNa})^{1.3} + ([Na^+]_i)^{1.3})) / (1.0 + \exp(-(V_m - E_{Na} + 120)/30)))$$

### Na<sup>+</sup>-Ca<sup>2+</sup> exchanger current, $I_{NCX}$

$$d_0 = 1 + ([Ca^{2+}]_o / K_{co}) \cdot (1 + \exp(Q_{co} \cdot V_m / E_T)) + ([Na^+]_o / K_{1no}) \cdot (1 + ([Na^+]_o / K_{2no}) \cdot (1 + [Na^+]_o / K_{3no}))$$

$$k_{43} = [Na^+]_i / (K_{3ni} + [Na^+]_i)$$

$$k_{41} = \exp(-Q_n \cdot V_m / (2 \cdot E_T))$$

$$k_{34} = [Na^+]_o / (K_{3no} + [Na^+]_o)$$

$$k_{21} = ([Ca^{2+}]_o / K_{co}) \cdot \exp(Q_{co} \cdot V_m / E_T) / d_0;$$

$$k_{23} = ([Na^+]_o / K_{1no}) \cdot ([Na^+]_o / K_{2no}) \cdot (1 + [Na^+]_o / K_{3no}) \cdot \exp(-Q_n \cdot V_m / (2 \cdot E_T)) / d_0$$

$$k_{32} = \exp(Q_n \cdot V_m / (2 \cdot E_T))$$

$$x_1 = k_{34} \cdot k_{41} \cdot (k_{23} + k_{21}) + k_{21} \cdot k_{32} \cdot (k_{43} + k_{41})$$

$$d_i = 1 + ([Ca^{2+}]_{sub} / K_{ci}) \cdot (1 + \exp(-Q_{ci} \cdot V_m / E_T)) + [Na^+]_i / K_{cni} + ([Na^+]_i / K_{1ni}) \cdot (1 + ([Na^+]_i / K_{2ni}) \cdot (1 + [Na^+]_i / K_{3ni}))$$

$$k_{12} = ([Ca^{2+}]_{sub}/K_{ci}) \cdot \exp(-Q_{ci} \cdot V_m/E_T)/d_i$$

$$k_{14} = ([Na^+]_i/K_{1ni}) \cdot ([Na^+]_i/K_{2ni}) \cdot (1 + [Na^+]_i/K_{3ni}) \cdot \exp(Q_n \cdot V_m/(2 \cdot E_T))/d_i$$

$$x_2 = k_{43} \cdot k_{32} \cdot (k_{14} + k_{12}) + k_{41} \cdot k_{12} \cdot (k_{34} + k_{32})$$

$$x_3 = k_{43} \cdot k_{14} \cdot (k_{23} + k_{21}) + k_{12} \cdot k_{23} \cdot (k_{43} + k_{41})$$

$$x_4 = k_{34} \cdot k_{23} \cdot (k_{14} + k_{12}) + k_{21} \cdot k_{14} \cdot (k_{34} + k_{32})$$

$$I_{NCX} = C \cdot K_{NaCa} \cdot (k_{21} \cdot x_2 - k_{12} \cdot x_1)/(x_1 + x_2 + x_3 + x_4)$$

### Sustained inward current, $I_{st}$

$$I_{st} = C \cdot g_{st} \cdot (V_m - E_{st}) \cdot q_a \cdot q_i$$

$$q_{a,\infty} = 1/(1 + \exp(-(V_m + 67)/5))$$

$$\alpha_{qa} = 1/(0.15 \cdot \exp(-V_m/11) + 0.2 \cdot \exp(-V_m/700))$$

$$\beta_{qa} = 1/(16 \cdot \exp(V_m/8) + 15 \cdot \exp(V_m/50))$$

$$\tau_{qa} = 1/(\alpha_{qa} + \beta_{qa})$$

$$\alpha_{qi} = 0.15 \cdot 1/(3100 \cdot \exp((V_m + 10)/13) + 700.3 \cdot \exp((V_m + 10)/70))$$

$$\beta_{qi} = 0.15 \cdot 1/(95.7 \cdot \exp(-(V_m + 10)/10) + 50 \cdot \exp(-(V_m + 10)/700)) + 0.000229/(1 + \exp(-(V_m + 10)/5))$$

$$q_{i,\infty} = \alpha_{qi}/(\alpha_{qi} + \beta_{qi})$$

$$\tau_{qi} = 1/(\alpha_{qi} + \beta_{qi})$$

### Reversal potential

$$E_{Na} = E_T \cdot \log([Na^+]_o/[Na^+]_i)$$

$$E_K = E_T \cdot \log([K^+]_o/[K^+]_i)$$

$$E_{KS} = E_T \cdot \log(( [K^+]_o + 0.12 \cdot [Na^+]_o ) / ( [K^+]_i + 0.12 \cdot [Na^+]_i ))$$

$$E_{Ca} = (E_T/2) \cdot \log([Ca^{2+}]_o/[Ca^{2+}]_{sub})$$

### Ca<sup>2+</sup> fluxes in the SR

$$j_{SRCarel} = k_s \cdot OO \cdot ([Ca^{2+}]_{jSR} - [Ca^{2+}]_{sub})$$

$$k_{CaSR} = MaxSR - (MaxSR - MinSR)/(1 + (EC_{50SR}/[Ca^{2+}]_{jSR})^{HSR})$$

$$k_{oSRCa} = k_{oCa}/k_{CaSR}$$

$$k_{iSRCa} = k_{iCa} \cdot k_{CaSR}$$

$$\begin{aligned} dR/dt &= (k_{im} \cdot RI - k_{iSRCa} \cdot [Ca^{2+}]_{sub} \cdot R) - (k_{oSRCa} \cdot [Ca^{2+}]_{sub}^2 \cdot R - k_{om} \cdot OO) \\ dOO/dt &= (k_{oSRCa} \cdot [Ca^{2+}]_{sub}^2 \cdot R - k_{om} \cdot OO) - (k_{iSRCa} \cdot [Ca^{2+}]_{sub} \cdot OO - k_{im} \cdot S) \\ dS/dt &= (k_{iSRCa} \cdot [Ca^{2+}]_{sub} \cdot OO - k_{im} \cdot S) - (k_{om} \cdot S - k_{oSRCa} \cdot [Ca^{2+}]_{sub}^2 \cdot RI) \\ dRI/dt &= (k_{om} \cdot S - k_{oSRCa} \cdot [Ca^{2+}]_{sub}^2 \cdot RI) - (k_{im} \cdot RI - k_{iSRCa} \cdot [Ca^{2+}]_{sub} \cdot R) \end{aligned}$$

### Intracellular $Ca^{2+}$ flux

$$kkkk = ([Ca^{2+}]_i/K_{mf})^{n_{up}} - ([Ca^{2+}]_{nSR}/K_{mr})^{n_{up}}$$

$$j_{up} = P_{up} \cdot (kkkk/(1 + kkkk))$$

$$j_{cadiff} = ([Ca^{2+}]_{sub} - [Ca^{2+}]_i)/\tau_{difca}$$

$$j_{tr} = ([Ca^{2+}]_{nSR} - [Ca^{2+}]_{jSR})/\tau_{diftr}$$

### $Ca^{2+}$ buffering

$$df_{TC} = k_{fTC} \cdot [Ca^{2+}]_i \cdot (1 - f_{TC}) - k_{bTC} \cdot f_{TC}$$

$$df_{TMC} = k_{fTMC} \cdot [Ca^{2+}]_i \cdot (1 - f_{TMC} - f_{TMM}) - k_{bTMC} \cdot f_{TMC}$$

$$df_{TMM} = k_{fTMM} \cdot [Mg^{2+}]_i \cdot (1 - f_{TMC} - f_{TMM}) - k_{bTMM} \cdot f_{TMM}$$

$$df_{CMi} = k_{fCM} \cdot [Ca^{2+}]_i \cdot (1 - f_{CMi}) - k_{bCM} \cdot f_{CMi}$$

$$df_{CMs} = k_{fCM} \cdot [Ca^{2+}]_{sub} \cdot (1 - f_{CMs}) - k_{bCM} \cdot f_{CMs}$$

$$df_{CQ} = k_{fCQ} \cdot [Ca^{2+}]_{jSR} \cdot (1 - f_{CQ}) - k_{bCQ} \cdot f_{CQ}$$

### Dynamics of $Ca^{2+}$ concentrations in cell compartments

$$\begin{aligned} d[Ca^{2+}]_i/dt &= ((j_{cadif} \cdot V_{sub} - j_{up} \cdot V_{nSR})/V_i) - (CM_{tot} \cdot (df_{CMi}/dt) + TC_{tot} \cdot (df_{TC}/dt) \\ &\quad + TCM_{tot} \cdot (df_{TMC}/dt)) \end{aligned}$$

$$d[Ca^{2+}]_{sub}/dt$$

$$\begin{aligned} &= (-I_{CaL} + I_{CaT} + I_{bCa} - 2 \cdot I_{NCX})/(2 \cdot F) + j_{SRcarel} \cdot V_{jSR}/V_{sub} - j_{cadiff} \\ &\quad - CM_{tot} \cdot df_{CMs} \end{aligned}$$

$$d[Ca^{2+}]_{jSR}/dt = j_{tr} - j_{SRCarel} - CQ_{tot} \cdot df_{CQ}$$

$$d[Ca^{2+}]_{nSR}/dt = j_{up} - j_{tr} \cdot V_{jSR}/V_{nSR}$$

## **1.2. References**

- Berkefeld, H., Fakler, B., and Schulte, U. (2010). Ca<sup>2+</sup>-activated K<sup>+</sup> channels: from protein complexes to function. *Physiol Rev* 90: 1437-1459.
- Hirschberg, B., Maylie, J., Adelman, J.P., and Marrion, N.V. (1998). Gating of recombinant small-conductance Ca-activated K<sup>+</sup> channels by calcium. *J Gen Physiol* 111:565-581.
- Kharche, S., Yu, J., Lei, M., and Zhang, H. (2011). A mathematical model of action potentials of mouse sinoatrial node cells with molecular bases. *Am J Physiol Heart Circ Physiol* 301: H945-963.
- Latorre, R., Oberhauser, A., Labarca, P., and Alvarez, O. (1989). Varieties of calcium-activated potassium channels. *Annu Rev Physiol* 51: 385-399.
- Logsdon, N.J., Kang, J., Togo, J.A., Christian, E.P., and Aiyar, J. (1997). A novel gene, hKCa4, encodes the calcium-activated potassium channel in human T lymphocytes. *J Biol Chem* 272: 32723-32726.
- McManus, O.B. (1991). Calcium-activated potassium channels: regulation by calcium. *J Bioenerg Biomembr* 23: 537-560.
- Pedarzani, P., Mosbacher, J., Rivard, A., Cingolani, L.A., Oliver, D., Stocker, M., Adelman, J.P., and Fakler, B. (2001). Control of electrical activity in central neurons by modulating the gating of small conductance Ca<sup>2+</sup>-activated K<sup>+</sup> channels. *J Biol Chem* 276: 9762-9769.



Silva, H.S., Kapela, A., and Tsoukias, N.M. (2007). A mathematical model of plasma membrane electrophysiology and calcium dynamics in vascular endothelial cells. *Am J Physiol Cell Physiol* 293: C277-293.

Xia, X.M., Fakler, B., Rivard, A., Wayman, G., Johnson-Pais, T., Keen, J.E., Ishii, T., Hirschberg, B., Bond, C.T., Lutsenko, S., *et al.* (1998). Mechanism of calcium gating in small-conductance calcium-activated potassium channels. *Nature* 395: 503-507.

## 2. Supplementary figure Legends

### **Appendix Figure S1: TRAM-34 does not interfere with voltage-gated $\text{Ca}^{2+}$ currents, $I_f$ and NCX currents in hESC-CMs.**

A. Representative trace of a voltage-ramp protocol before and after applying 5  $\mu\text{M}$  TRAM-34. Cells were held at -20 mV and a voltage ramp of 150 ms from -90 to +60 mV was applied. The experiments were performed in zero free  $\text{Ca}^{2+}$  in the pipet solution (n = 7).

B. Sensitivity of the  $I_f$  current to 5  $\mu\text{M}$  TRAM-34. Shown are current-density voltage relations (n = 3-9). Cells were held at -40 mV and the membrane voltage was stepped from -40 mV to -100 mV.

C. Representative traces showing in the same cell the sensitivity of the  $I_{\text{NCX}}$  current before and after exposure to 5  $\mu\text{M}$  TRAM-34, followed by washout and exposure to 3  $\mu\text{M}$  KB-R7943. A voltage ramp protocol was performed from +50 mV to -100 mV for 215 ms. The effects of 3  $\mu\text{M}$  KB-R7943 and 5  $\mu\text{M}$  TRAM-34 were examined using the voltage ramp protocol and quantified as percentage of inhibition from control at -100 mV and +50 mV (n = 3-9).

### **Appendix Figure S2: SK4 $\text{K}^+$ channels modulate the firing rate in WT mouse SAN cells.**

A and B. Representative traces of spontaneous APs recorded in SAN cells under the indicated conditions.

C. Data summary of TRAM-34 (2  $\mu\text{M}$ ) on MDP and firing rate. Two-Tailed paired *t*-test. TRAM-34 significantly decreased the spontaneous firing rate (\*P = 0.0446, n = 5) and depolarized the MDP (\*\*P = 0.0013, n = 5).

### **Appendix Figure S3: Blockade of SK4 channels by clotrimazole improves the ECG arrhythmic features of CASQ2-D307H KI and CASQ2 KO mice under rest conditions**

A. Representative ECG recording following intraperitoneal injection of vehicle (upper) and 20 mg/kg clotrimazole (lower) in WT mice at rest. Sequential vehicle and clotrimazole injections were performed on the same animal.

B. Data summary of heart rate (Paired *t*-test; \**P* =0.0364, *n* = 10) and PR interval (Paired *t*-test; \**P* =0.0437, *n* = 10) in WT mice at rest.

C. Representative ECG recording following IP injection of vehicle (upper) and 20 mg/kg clotrimazole (lower) in CASQ2-D307H KI mice at rest.

D. Data summary of heart rate (Paired *t*-test; \**P* =0.0260, *n* = 7) and PR interval (P not significant, *n* = 7) in CASQ2-D307H KI mice at rest.

E. Representative ECG recording following IP injection of vehicle (upper) and 20 mg/kg clotrimazole (lower) in CASQ2 KO mice at rest.

F. Data summary of heart rate (Paired *t*-test; \*\**P* =0.0078, *n* = 7) and PR interval (Paired *t*-test; \**P* = 0.0111, *n* = 7) in CASQ2 KO mice at rest.

**Appendix Figure S4: Blockade of SK4 channels by clotrimazole improves the ECG arrhythmic features of CASQ2-D307H KI and CASQ2 KO mice during treadmill exercise.**

A. Representative ECG recording following intraperitoneal injection of vehicle (upper) and 20 mg/kg clotrimazole (lower) in WT mice during treadmill exercise.

B. Data summary of heart rate (Paired *t*-test; \**P* = 0.0229, *n* = 10) and PR interval (P not significant, *n* = 10).

C. Representative ECG recording following IP injection of vehicle (upper) and 20 mg/kg clotrimazole (lower) in CASQ2-D307H KI mice during treadmill exercise. Note how clotrimazole changed the non-sustained ventricular tachycardia (NSVT) into ventricular premature complex (VPC).

D. Data summary of heart rate (Paired *t*-test; \*\**P* =0.004, *n* = 7) and PR interval (Paired *t*-test; \**P* = 0.0305, *n* = 7) in CASQ2-D307H KI mice during treadmill exercise.

E. Representative ECG recording following IP injection of vehicle (upper) and 20 mg/kg clotrimazole (lower) in CASQ2 KO mice during exercise.

F. Data summary of heart rate (Paired *t*-test; \*\**P* =0.0037, *n* = 7) and PR interval (Paired *t*-test; \**P* = 0.0394, *n* = 7) in CASQ2 KO mice during exercise.

**Appendix Figure S5: Model predictions with or without  $I_{SK4}$  gating time constants.**

A-D. Model predictions with (blue traces) and without (orange traces) the contribution of  $I_{SK4}$ . When  $I_{SK4}$  was added to the model, the channel activation and deactivation time constants were constrained to  $\tau_a = 5$  ms and  $\tau_d = 50$  ms, respectively. From the  $Ca^{2+}$ -dependent sensitivity curve of SK4 channel activation measured by Logsdon et al. [2], we constrained the model with a Hill slope of  $n_x = 2.7$  and a  $Ca^{2+}$  dissociation constant of  $k_x = 0.27$   $\mu$ M.

E-H. Model predictions with (blue traces) and without (orange traces) the contribution of  $I_{SK4}$ . The model was constrained with a Hill slope of  $n_x = 2.7$  and a  $Ca^{2+}$  dissociation constant of  $k_x = 0.27$   $\mu$ M but the gating time constants were removed from the equations. Action potential:  $V_m$  (A,E), heart rate: HR (B, F), SK4 current density:  $I_{SK4}$  (C, G) and  $Ca^{2+}$  concentration in the submembrane space:  $[Ca^{2+}]_{sub}$ . Note the important drop in the HR when removing the contribution of  $I_{SK4}$ .

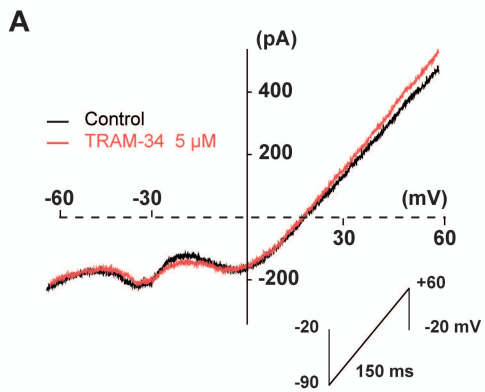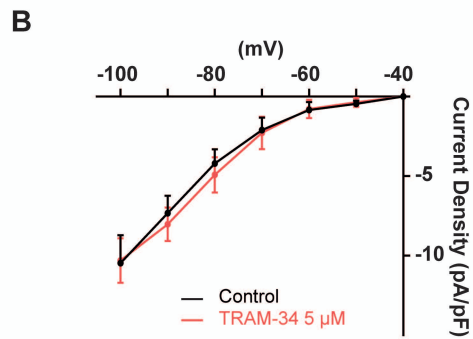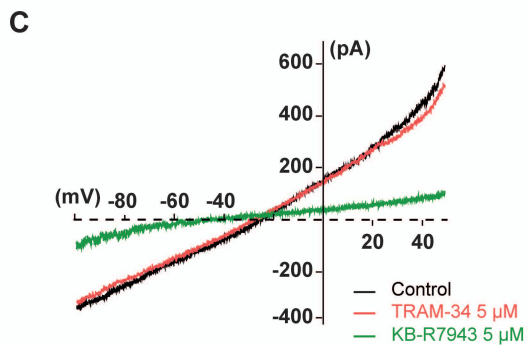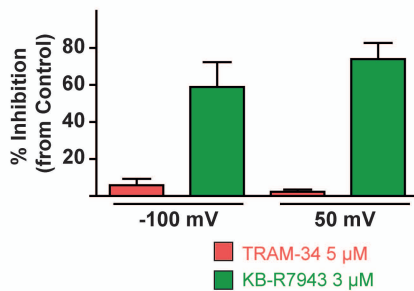

**A**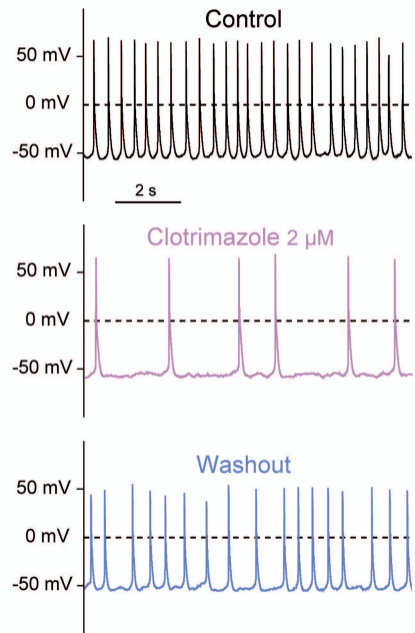**B**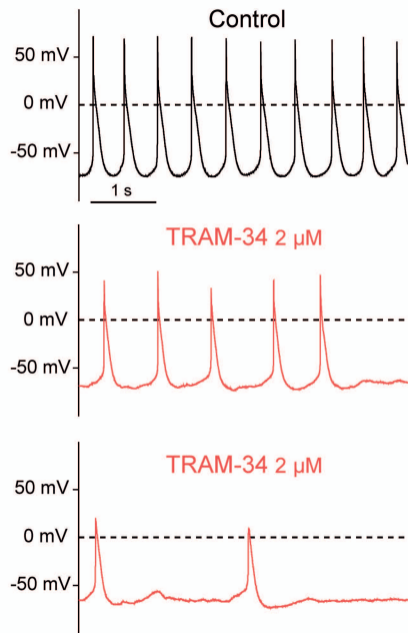**C**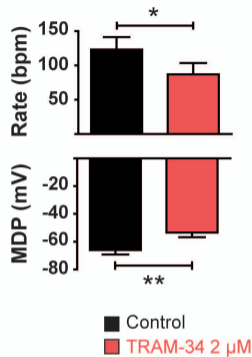

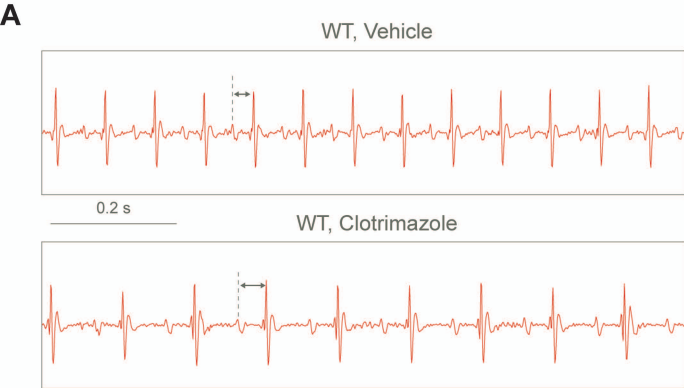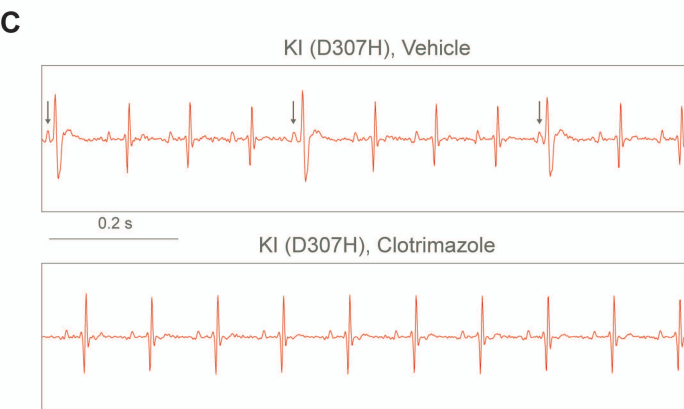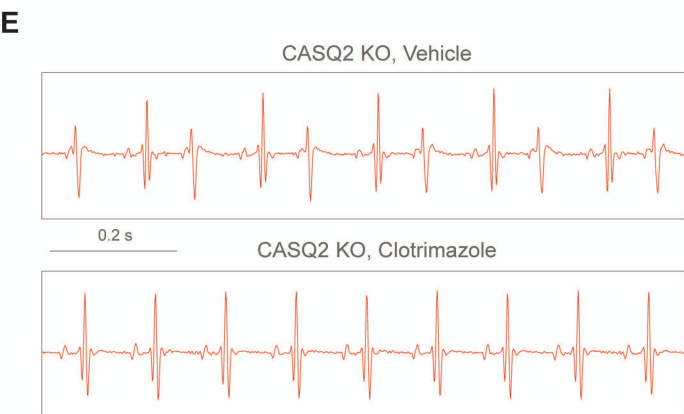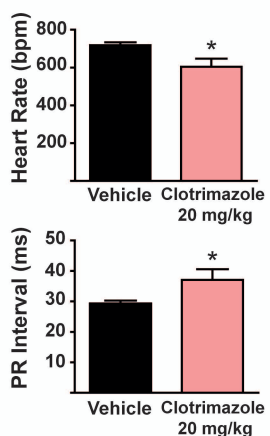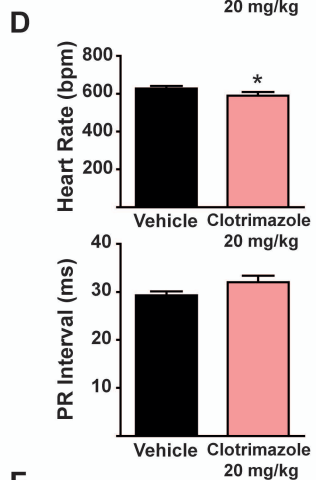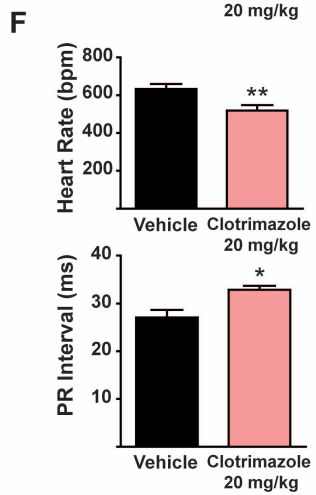

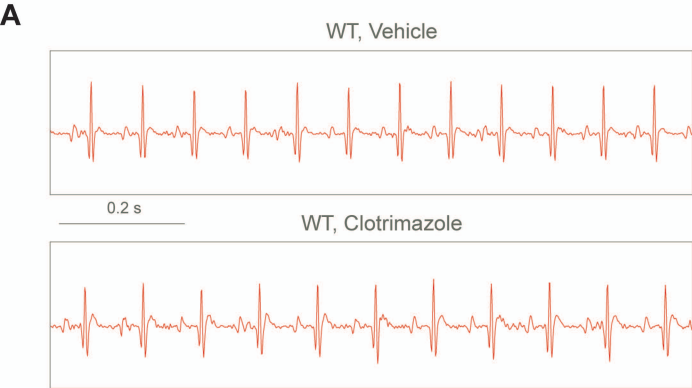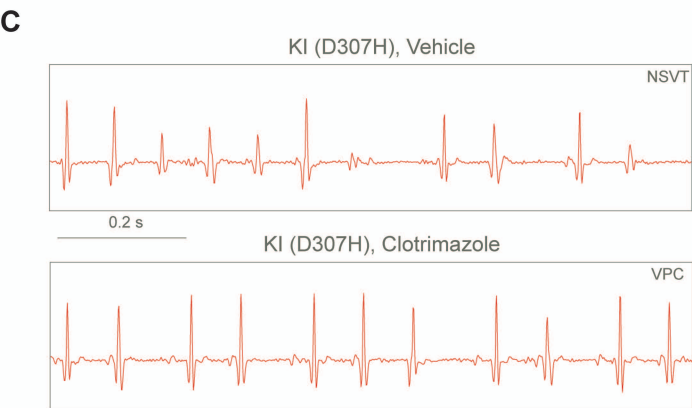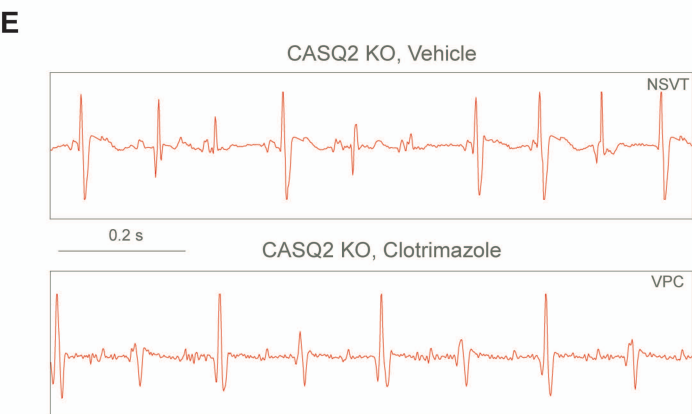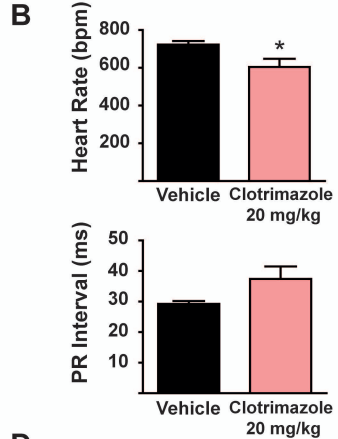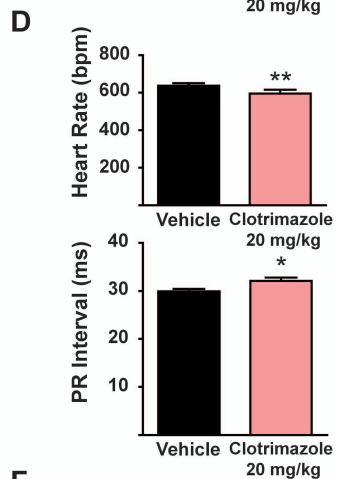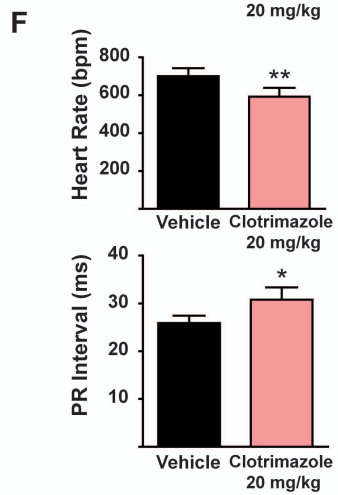



**A**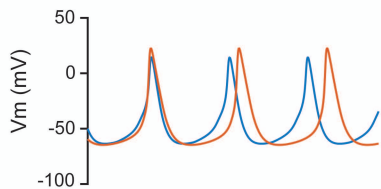**B**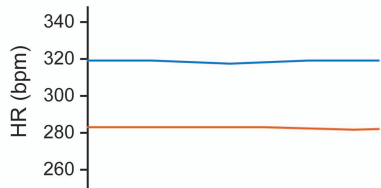**C**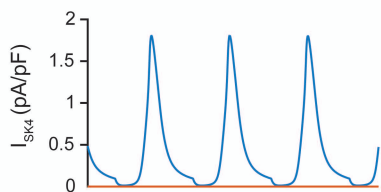**D**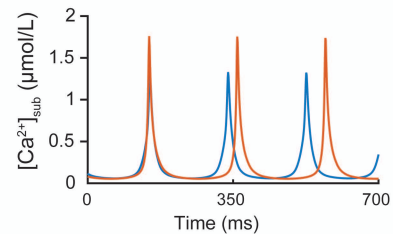

— model with  $I_{SK4}$   
 — model without  $I_{SK4}$

**E**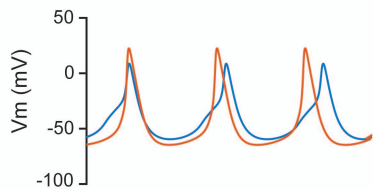**F**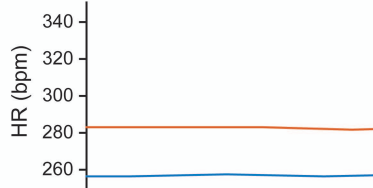**G**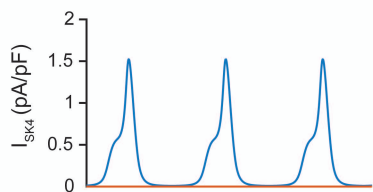**H**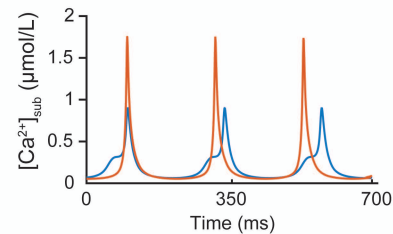

— model with  $I_{SK4}$  but no time constants  
 — model without  $I_{SK4}$
